# Supplementary material
Source: Research Square preprint supplement (doi:10.21203/rs.3.rs-9632354/v1)
Supplement: Supplementary file 1 [file 19252dead4aea814c93b0b55.docx]

Supplementary table 1: Variables and coding

| **Category** | **Variable** | **Coding / Categories** |
| --- | --- | --- |
| **Maternal factors** | Age (years) | <21 = 0; 21-35 = 1; >35 = 2 |
|  | Marital status | Single = 1; Married = 2 |
|  | Anaemia status | Yes = 0; No = 1 |
|  | Antenatal care visits | <4 visits = 1; ≥4 visits = 2 |
|  | Iron supplementation | No = 0; Yes = 1 |
|  | Deworming during pregnancy | No = 0; Yes = 1 |
|  | Education level | No education = 1; Primary = 2; Secondary = 3; Higher = 4 |
|  | Employment status | No = 0; Yes = 1 |
| **Child factors** | Birth weight | Normal = 1; Low = 2; High = 3 |
|  | Sex | Male = 1; Female = 2 |
|  | Age group | 7-12 months = 1; 13-24 months = 2; >24 months = 3 |
|  | Breastfeeding duration | Never = 0; <6 months = 1; 6-24 months = 2; 25-48 months = 3 |
|  | Stunting | Yes = 0; No = 1 |
|  | Wasting | Yes = 0; No = 1 |
|  | Birth interval | <24 months = 1; 24-59 months = 2; >59 months = 3 |
|  | Diarrhoea (last 2 weeks) | Yes = 0; No = 1 |
|  | Fever (last 2 weeks) | Yes = 0; No = 1 |
|  | Vitamin A supplementation | No = 0; Yes = 1 |
| **Sociodemographic factors** | Wealth index | Poorest = 1; Poor = 2; Middle = 3; Richer = 4; Richest = 5 |
|  | Toilet sanitation | Unimproved = 0; Improved = 1 |
|  | Water source | Unimproved = 0; Improved = 1 |
|  | Place of delivery | Home/other = 0; Public facility = 1; Private facility = 2 |
|  | Residence | Rural = 0; Urban = 1 |
|  | Region | Kigali = 1; South = 2; West = 3; North = 4; East = 5 |
|  | Children under 5 in the household | >3 = 0; 2 = 1; 1 = 2 |
|  | Household size | ≥6 members = 0; <5 members = 1 |
|  | Listen to the radio | Not at all = 0; <1/week = 1; ≥1/week = 2 |
|  | Watch TV | Not at all = 0; <1/week = 1; ≥1/week = 2 |
